# Supplementary material for: Prevaccination Glycan Markers of Response to an Influenza Vaccine Implicate the Complement Pathway
Source: PubMed Central journal article supplement — J Proteome Res. 2022 Jun 27;21(8):1974–85. doi: 10.1021/acs.jproteome.2c00251 (PMC9361353; doi:10.1021/acs.jproteome.2c00251), 2022-06-27
Supplement: pr2c00251_si_001.pdf [file pr2c00251_si_001.pdf]

# Supporting Information

## *Pre-Vaccination Glycan Markers of Response to Influenza Vaccine Implicate the Complement Pathway*

*Rui Qin<sup>1</sup>, Guanmin Meng<sup>1</sup>, Smruti Pushalkar<sup>2</sup>, Michael A. Carlock<sup>3</sup>, Ted M. Ross<sup>3</sup>, Christine Vogel<sup>2</sup>, Lara K. Mahal<sup>1</sup>\**

1 Department of Chemistry, University of Alberta, Edmonton, AB T6G 2G2, CANADA;

2 Center for Genomics and Systems Biology, Department of Biology, New York University,  
New York, NY 10003, USA;

3 Center for Vaccines and Immunology, University of Georgia, Athens, GA 30602, USA

\* Corresponding author: Lara K. Mahal; Email: [lkmahal@ualberta.ca](mailto:lkmahal@ualberta.ca); Mailing address: 11227

Saskatchewan Drive, Edmonton, Alberta, Canada T6G 2G2

## Table of Contents

Figure S1. Volcano plot comparing lectin microarray data for high responders and non-responders pre-vaccination.

Figure S2. Volcano plot comparing lectin microarray data for high responders and low/moderate-responders pre-vaccination.

Figure S3. Association of multiple factors with microarray data of BambL and anti-Le<sup>a</sup> data.

Figure S4. Volcano plot comparing lectin microarray data for re-defined high responders and non-responders pre-vaccination.

Figure S5. Volcano plot comparing lectin microarray data for high responders and non-responders pre-vaccination to the A/H1N1 (A/Brisbane/02/2018) strain.

Figure S6. Volcano plot comparing lectin microarray data for high responders and non-responders pre-vaccination to the A/H3N2 (A/Kansas/14/2017) strain.

Figure S7. Volcano plot comparing lectin microarray data for high responders and non-responders pre-vaccination to the B/Yamagata (B/Phuket/3073/2013) strain.

Figure S8. Volcano plot comparing lectin microarray data for high responders and non-responders pre-vaccination to the B/Victoria (B/Colorado/6/2017-like) strain.

Figure S9. Boxplot analysis of the correlation coefficient between pre- and post-vaccination lectin microarray data.

Figure S10. Volcano plot comparing the paired pre- and post-vaccination lectin microarray data of all participants.

Figure S11. Volcano plot comparing the paired pre- and post-vaccination lectin microarray data of high responders.

Figure S12. Volcano plot comparing the paired pre- and post-vaccination lectin microarray data of non-responders.

Figure S13. Volcano plot comparing lectin microarray data for high responders and low/moderate-responders post-vaccination.

Table S1. List of Probes Printed on Lectin Microarrays.

Table S2. Excel file of Raw LFQ Data from Pulldowns.

Table S3. Serum Glycoproteins Enriched by BamBL.

Table S4. Serum Glycoproteins Enriched by Anti-Le<sup>a</sup>.

Table S5. Characteristics of Study Participants Grouped by Strain-specific Response

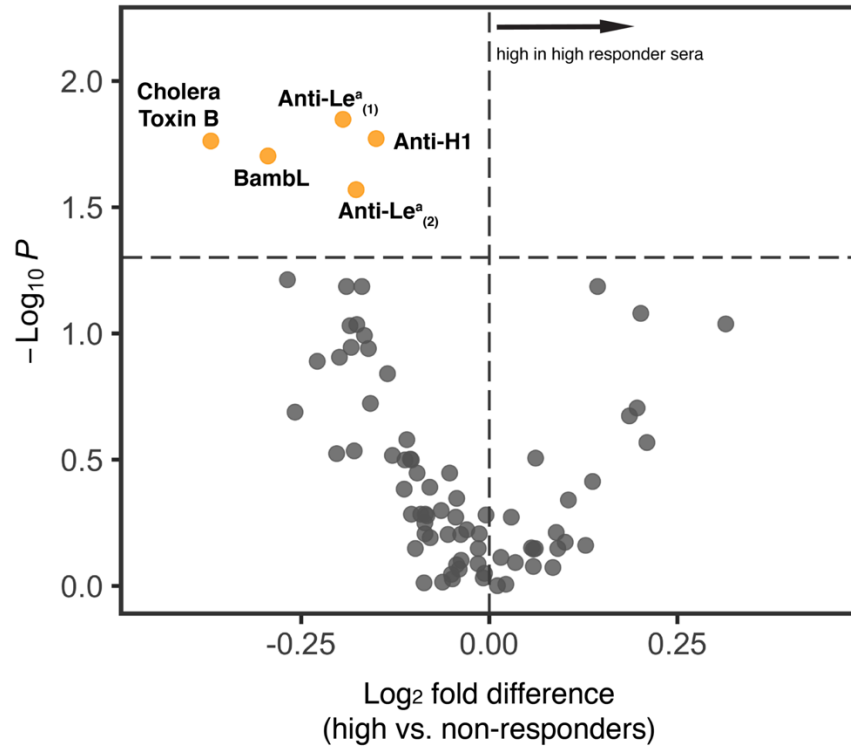

**Figure S1.** Volcano plot comparing lectin microarray data for high responders (N = 66) and non-responders (N = 54) pre-vaccination. A positive fold change denotes higher binding of the probe in high responders. Mann–Whitney U test was used to determine p-values. Probes with  $p < 0.05$  are colored in yellow. Companion Figure to **Figure 2**.

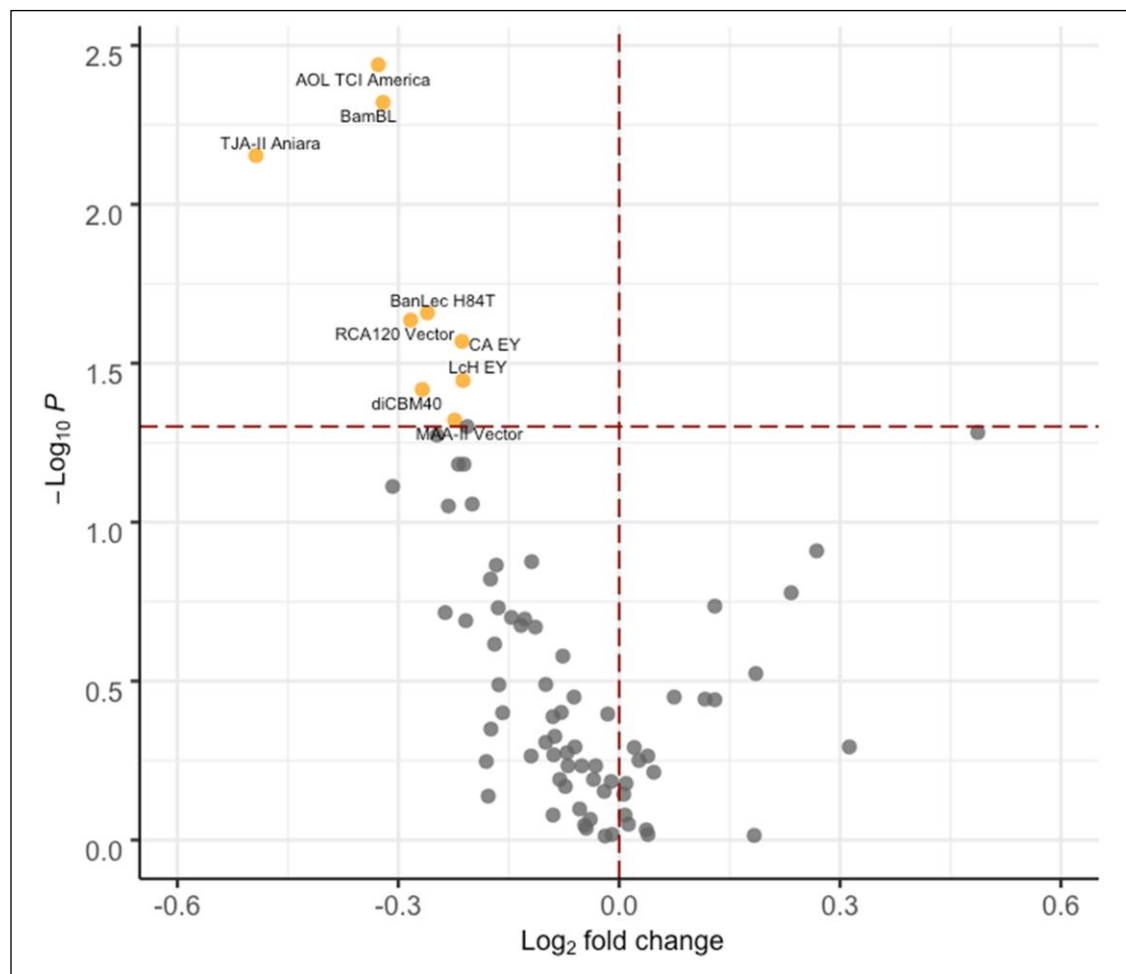

**Figure S2.** Volcano plot comparing lectin microarray data for high responders (N = 66) and low/moderate-responders (N = 39) pre-vaccination. A positive fold change denotes higher binding of the probe in high responders. Mann–Whitney U test was used to determine p-values. Probes with  $p < 0.05$  are colored in yellow.

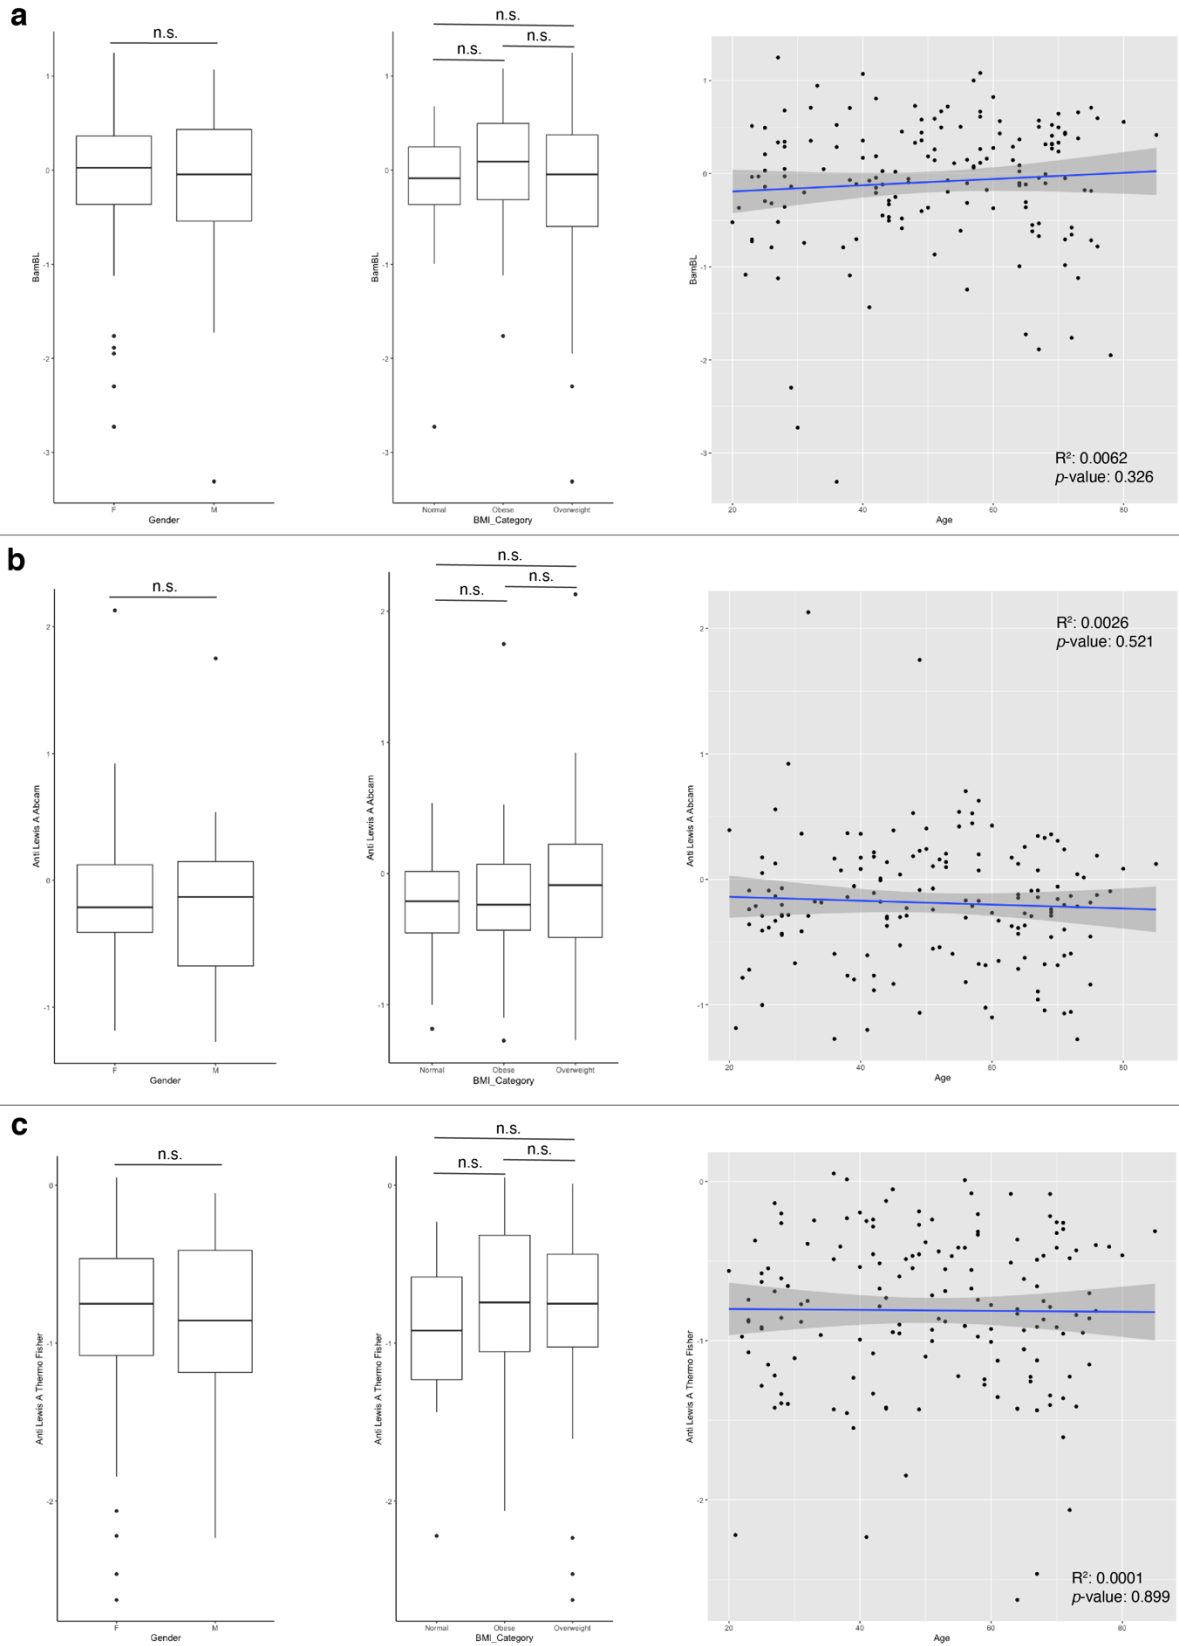

(see next page for Figure caption)

**Figure S3.** Association of multiple factors with microarray data of (a) BambL, (b) anti-Le<sup>a</sup> (Abcam), and (c) anti-Le<sup>a</sup> (Thermo Fisher). For association analysis of gender (left) and body-mass index (BMI, middle), boxplots comparing data between different groups are shown. “n.s.” indicates a p-value > 0.05 derived from Mann-Whitney U test. “Normal”, “Overweight” and “Obese” correspond to  $18 \leq \text{BMI} < 25$ ,  $25 \leq \text{BMI} < 30$  and  $30 \leq \text{BMI}$ , respectively. For association analysis of age (right), linear fitting of data with age is shown, including the fitting line (blue), 95% confidence interval (dark grey), R<sup>2</sup> value and p-value of the linear fit.

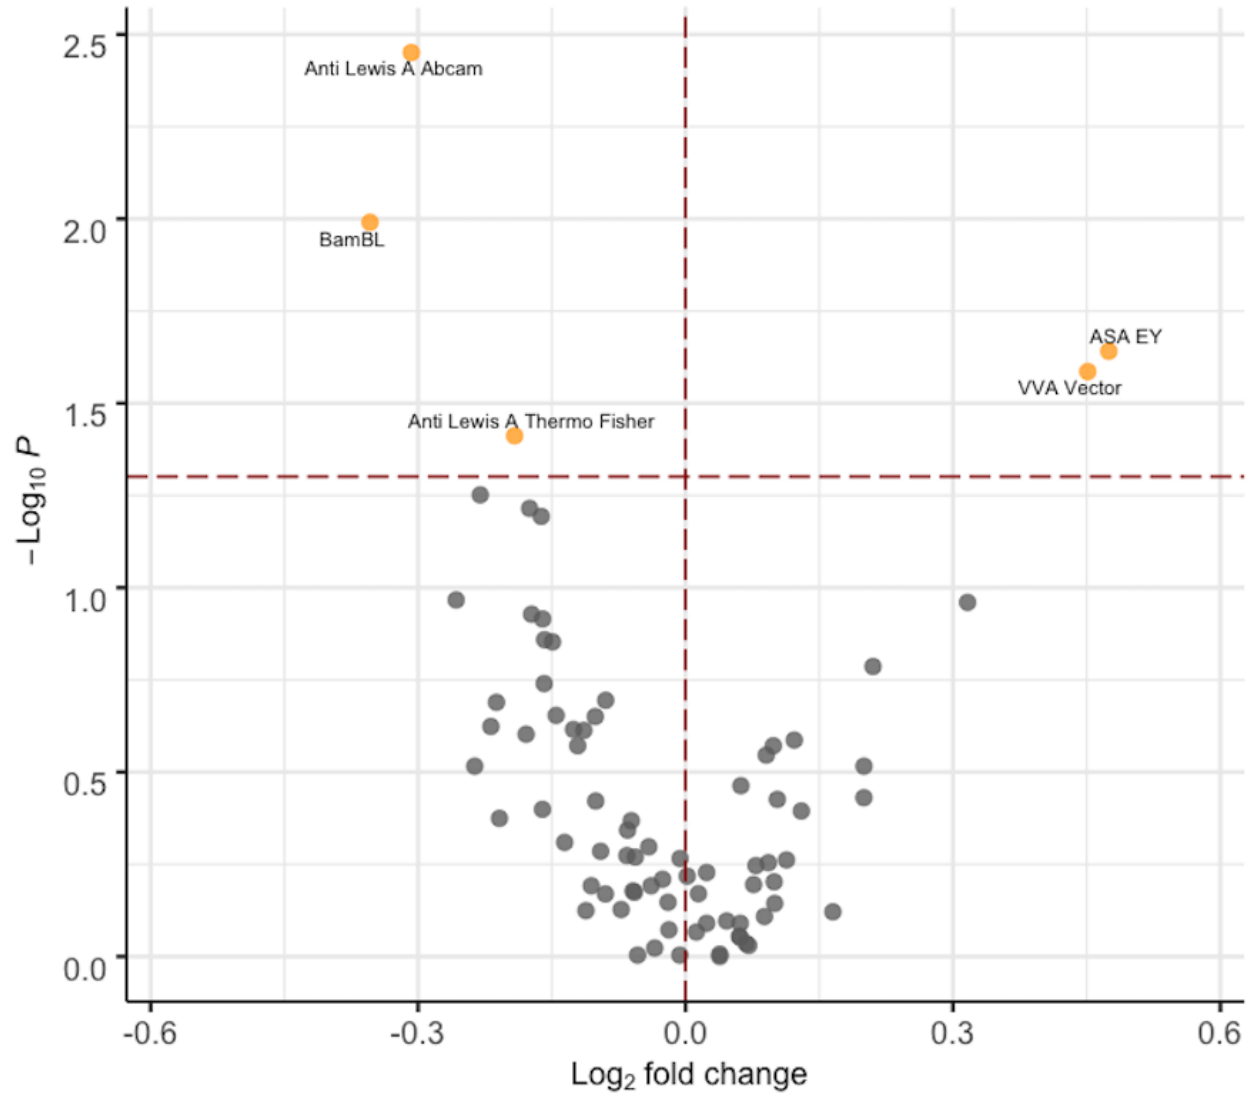

**Figure S4.** Volcano plot comparing lectin microarray data for re-defined high responders (N = 48) and non-responders (N = 48) pre-vaccination. Re-definition of responder groups was based on the response score of Wu et al. (see main paper reference 24) which takes into account BMI, age and gender. Participants who scored among the top tertile were considered high-responders, and participants who scored among the bottom tertile were considered non-responders. A positive fold change denotes higher binding of the probe in high responders. Mann–Whitney U test was used to determine p-values. Probes with  $p < 0.05$  are colored in yellow.



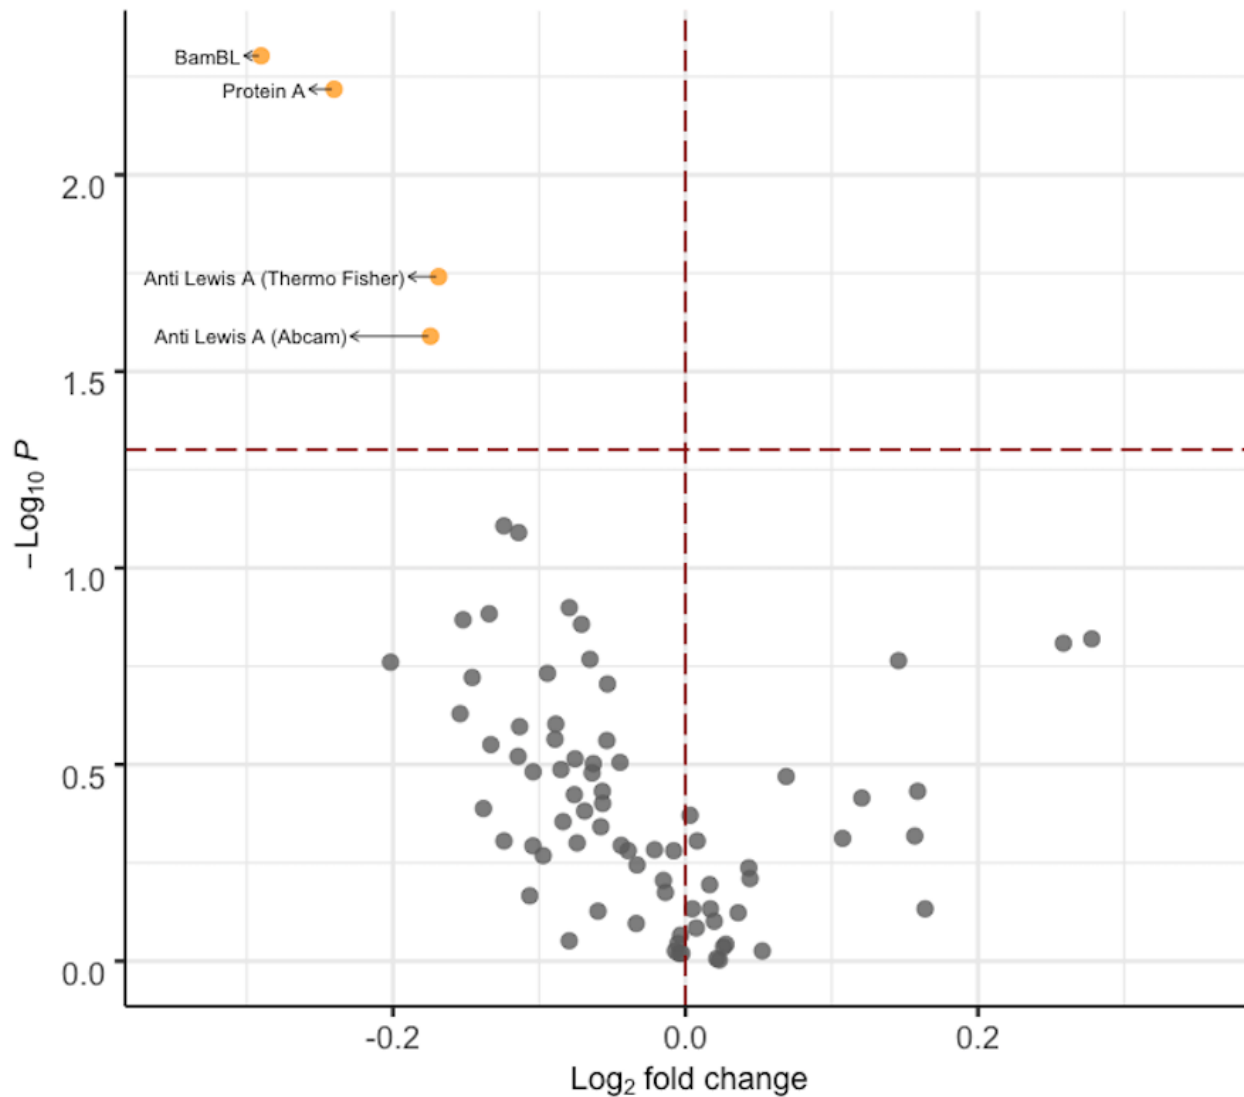

**Figure S5.** Volcano plot comparing lectin microarray data for high responders (N = 67) and non-responders (N = 65) pre-vaccination to the A/H1N1 (A/Brisbane/02/2018) strain. A positive fold change denotes higher binding of the probe in high responders. Mann–Whitney U test was used to determine p-values. Probes with  $p < 0.05$  are colored in yellow.

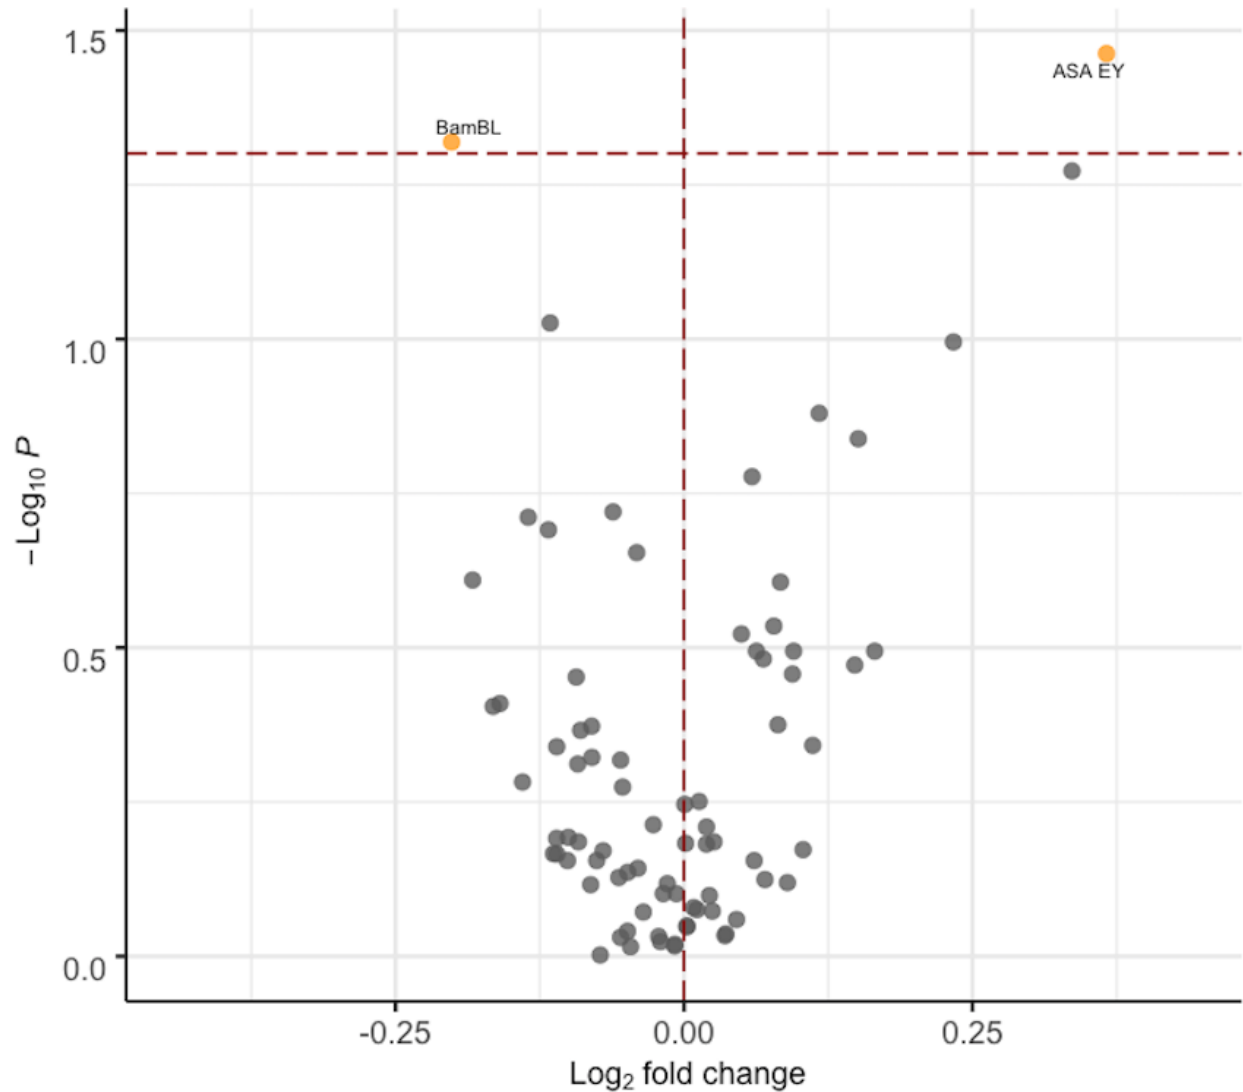

**Figure S6.** Volcano plot comparing lectin microarray data for high responders ( $N = 86$ ) and non-responders ( $N = 64$ ) pre-vaccination to the A/H3N2 (A/Kansas/14/2017) strain. A positive fold change denotes higher binding of the probe in high responders. Mann–Whitney U test was used to determine p-values. Probes with  $p < 0.05$  are colored in yellow.

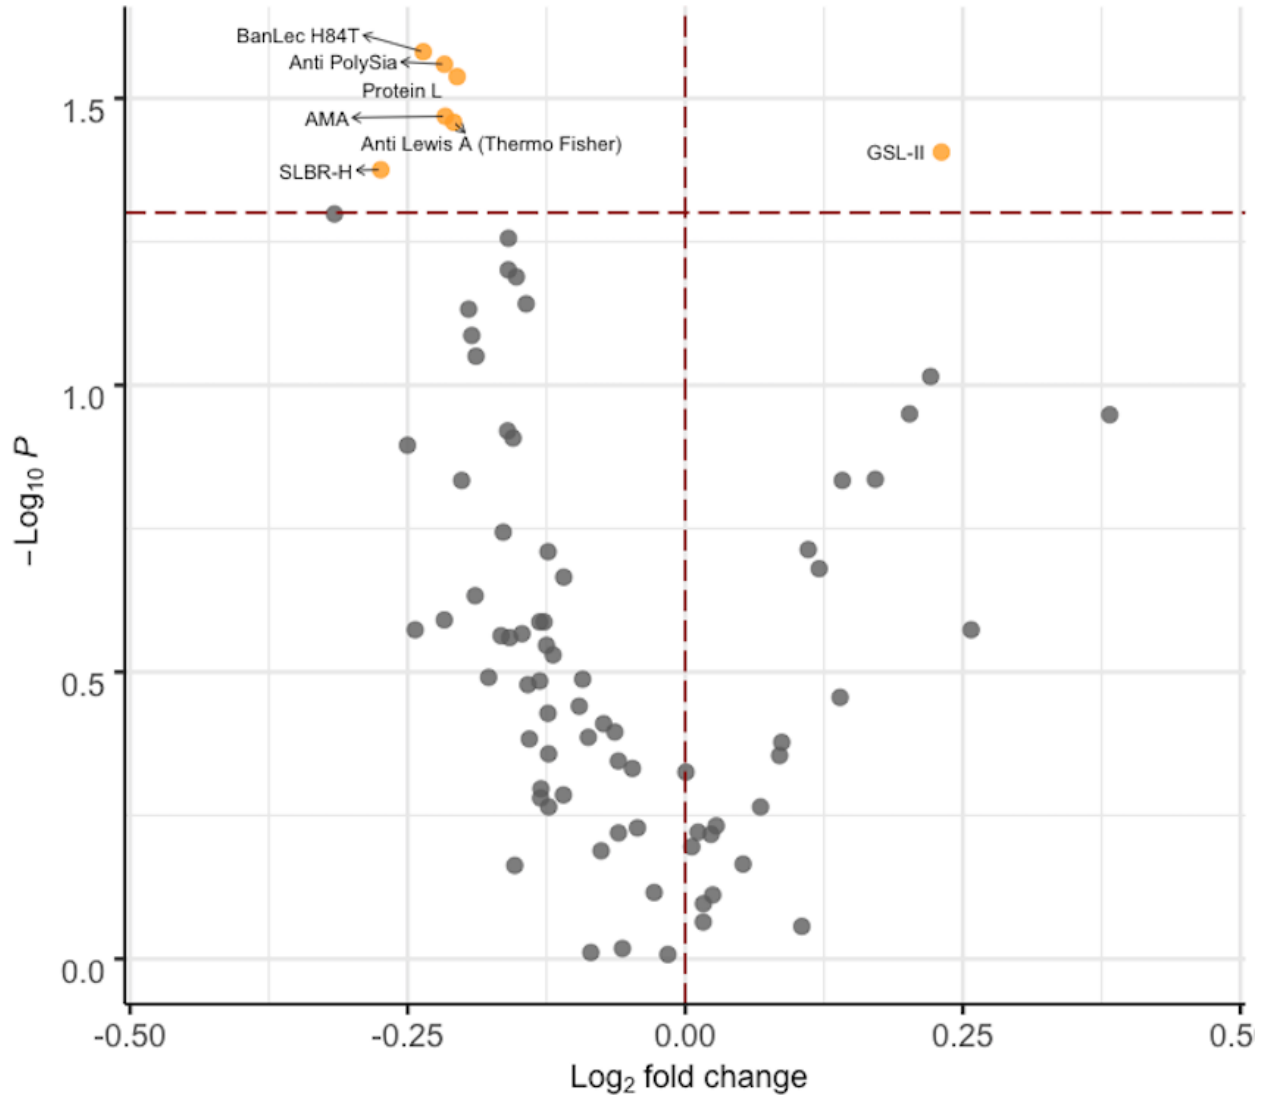

**Figure S7.** Volcano plot comparing lectin microarray data for high responders (N = 65) and non-responders (N = 62) pre-vaccination to the B/Yamagata (B/Phuket/3073/2013) strain. A positive fold change denotes higher binding of the probe in high responders. Mann–Whitney U test was used to determine p-values. Probes with  $p < 0.05$  are colored in yellow.

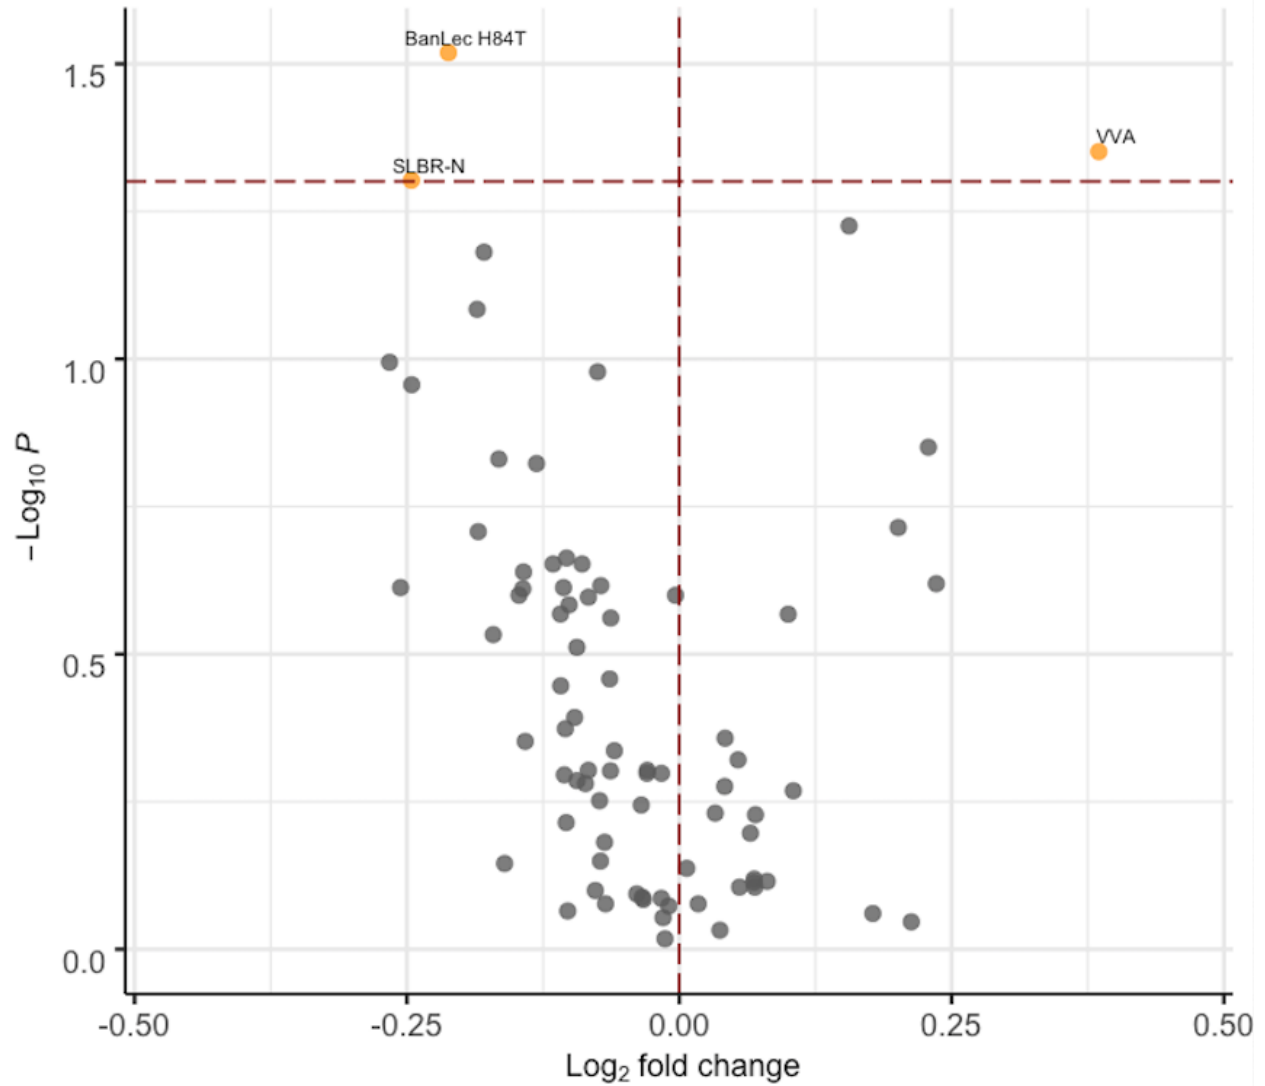

**Figure S8.** Volcano plot comparing lectin microarray data for high responders ( $N = 68$ ) and non-responders ( $N = 65$ ) pre-vaccination to the B/Victoria (B/Colorado/6/2017-like) strain. A positive fold change denotes higher binding of the probe in high responders. Mann–Whitney U test was used to determine p-values. Probes with  $p < 0.05$  are colored in yellow.

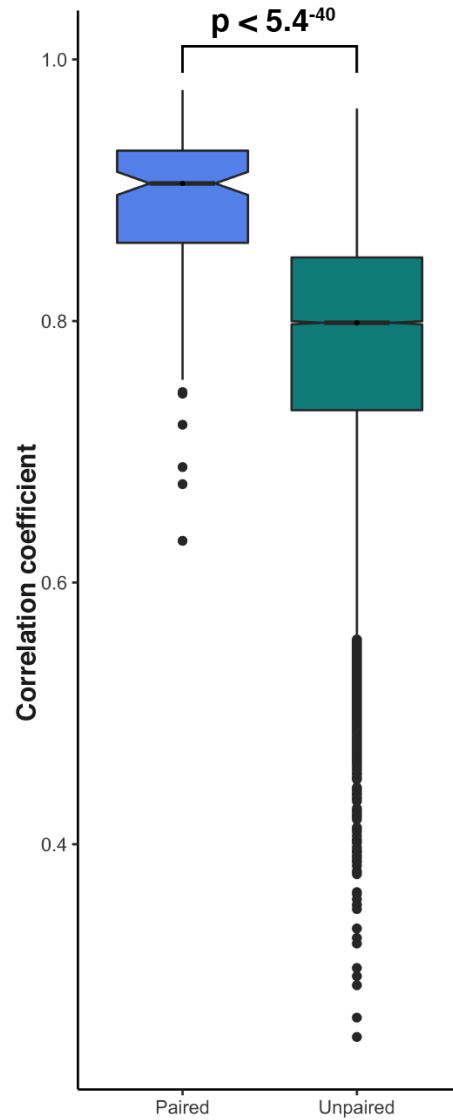

**Figure S9.** Boxplot analysis of the correlation coefficient between pre- and post-vaccination lectin microarray data. Paired: correlation coefficients of the pre- and post-vaccination glycomes of the same individuals; Unpaired: correlation coefficients of the pre- and post-vaccination glycomes of different individuals. Student's t-test was performed on the Fisher transformed-correlation coefficients.

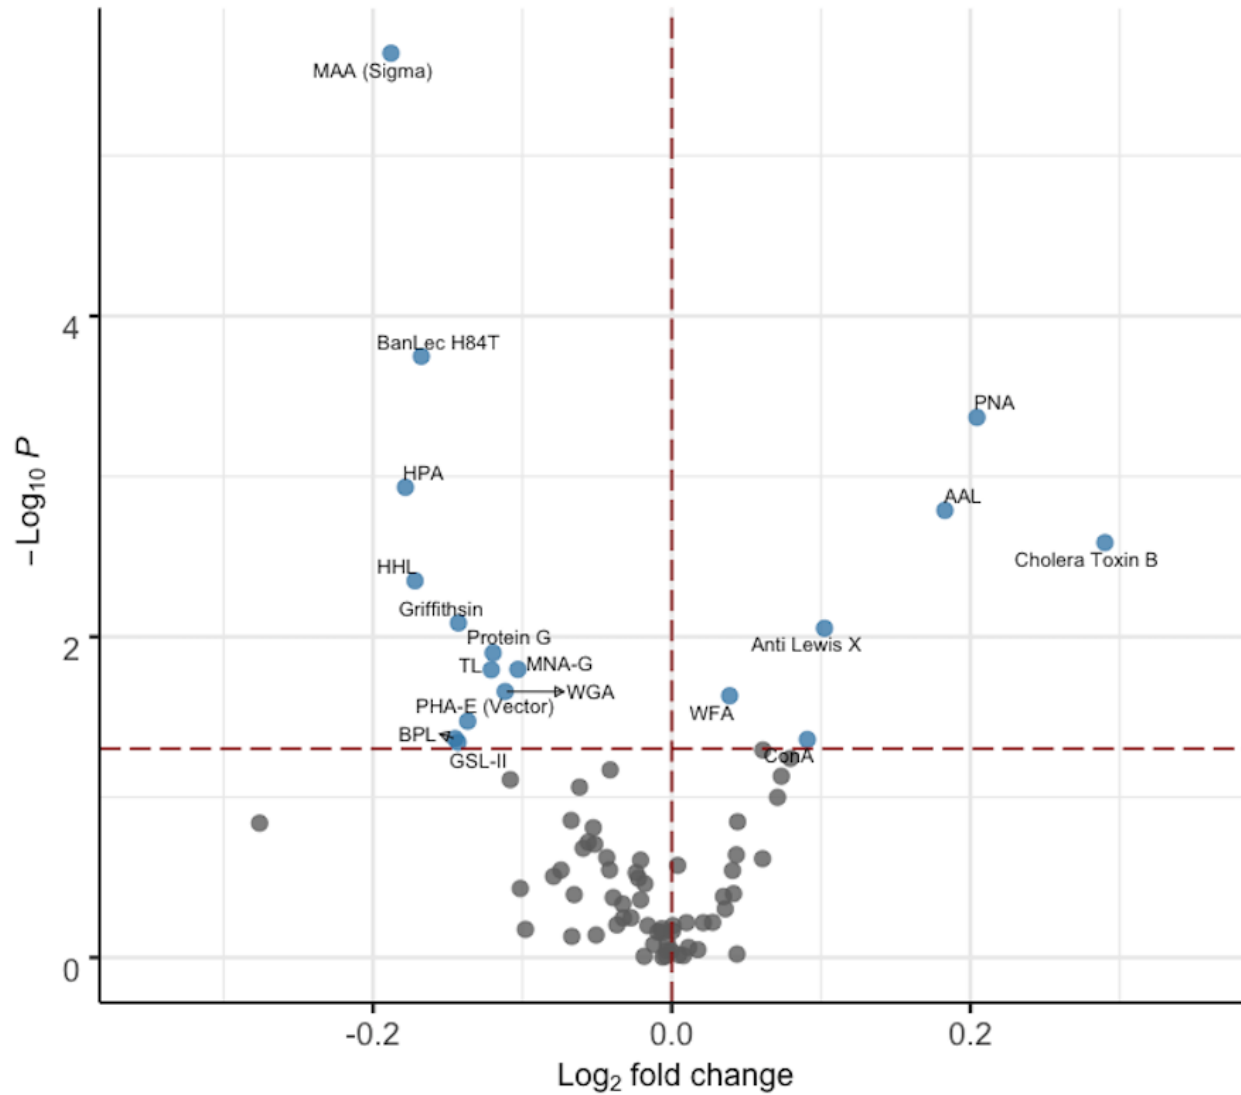

**Figure S10.** Volcano plot comparing the paired pre- and post-vaccination lectin microarray data of all participants. A positive fold change denotes higher binding of the probe to post-vaccination sera (upregulation). Paired Mann–Whitney U test was used to determine p-values. Probes with  $p < 0.05$  are colored in blue.

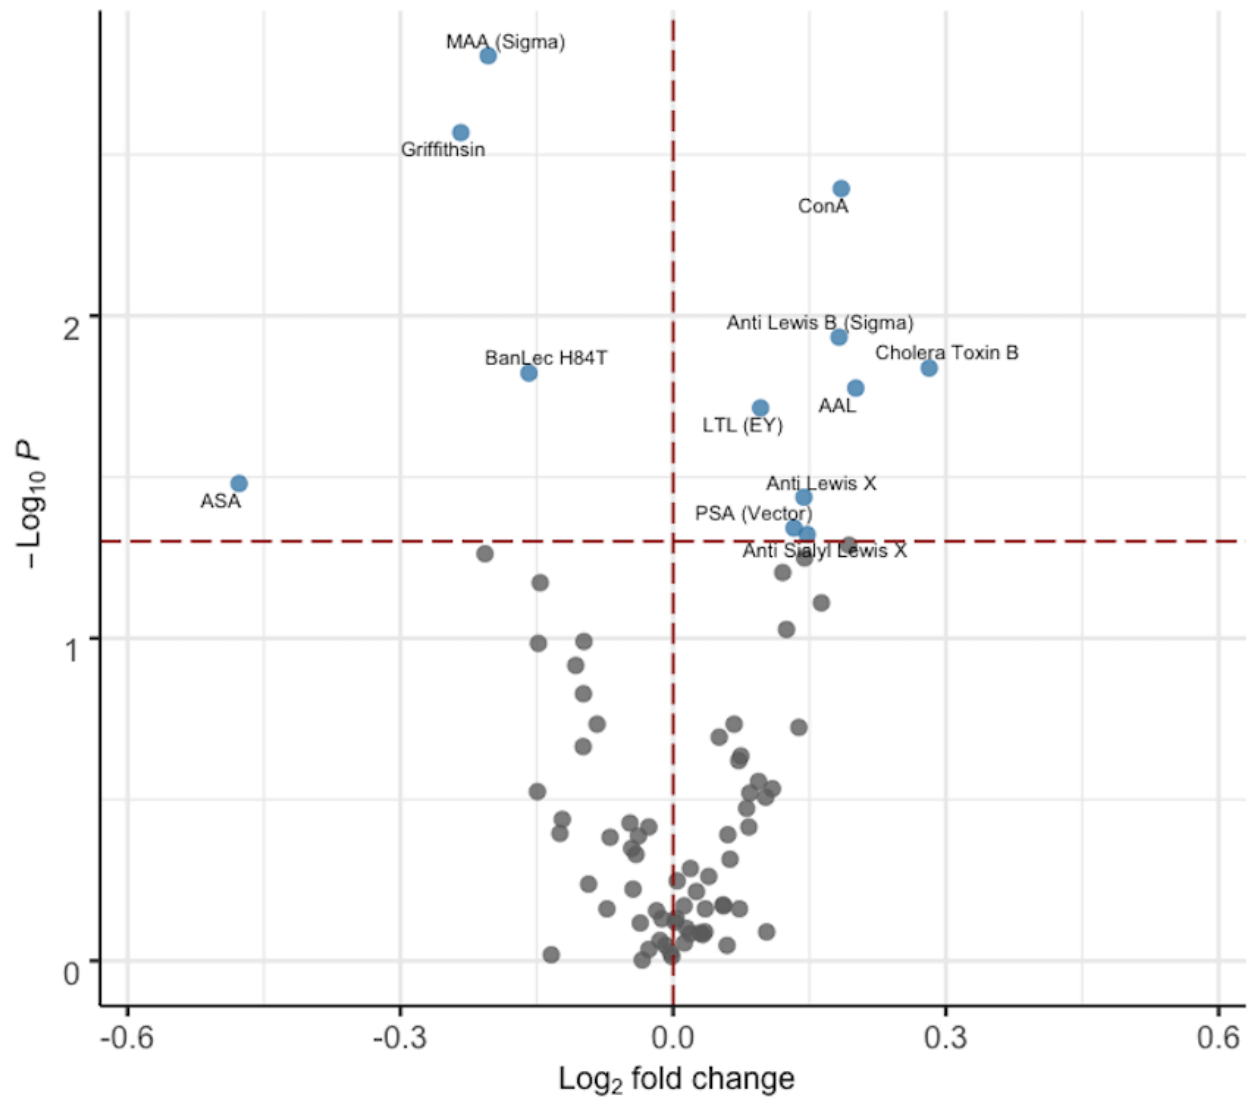

**Figure S11.** Volcano plot comparing the paired pre- and post-vaccination lectin microarray data of high responders. A positive fold change denotes higher binding of the probe to post-vaccination sera (upregulation). Paired Mann–Whitney U test was used to determine p-values. Probes with  $p < 0.05$  are colored in blue.

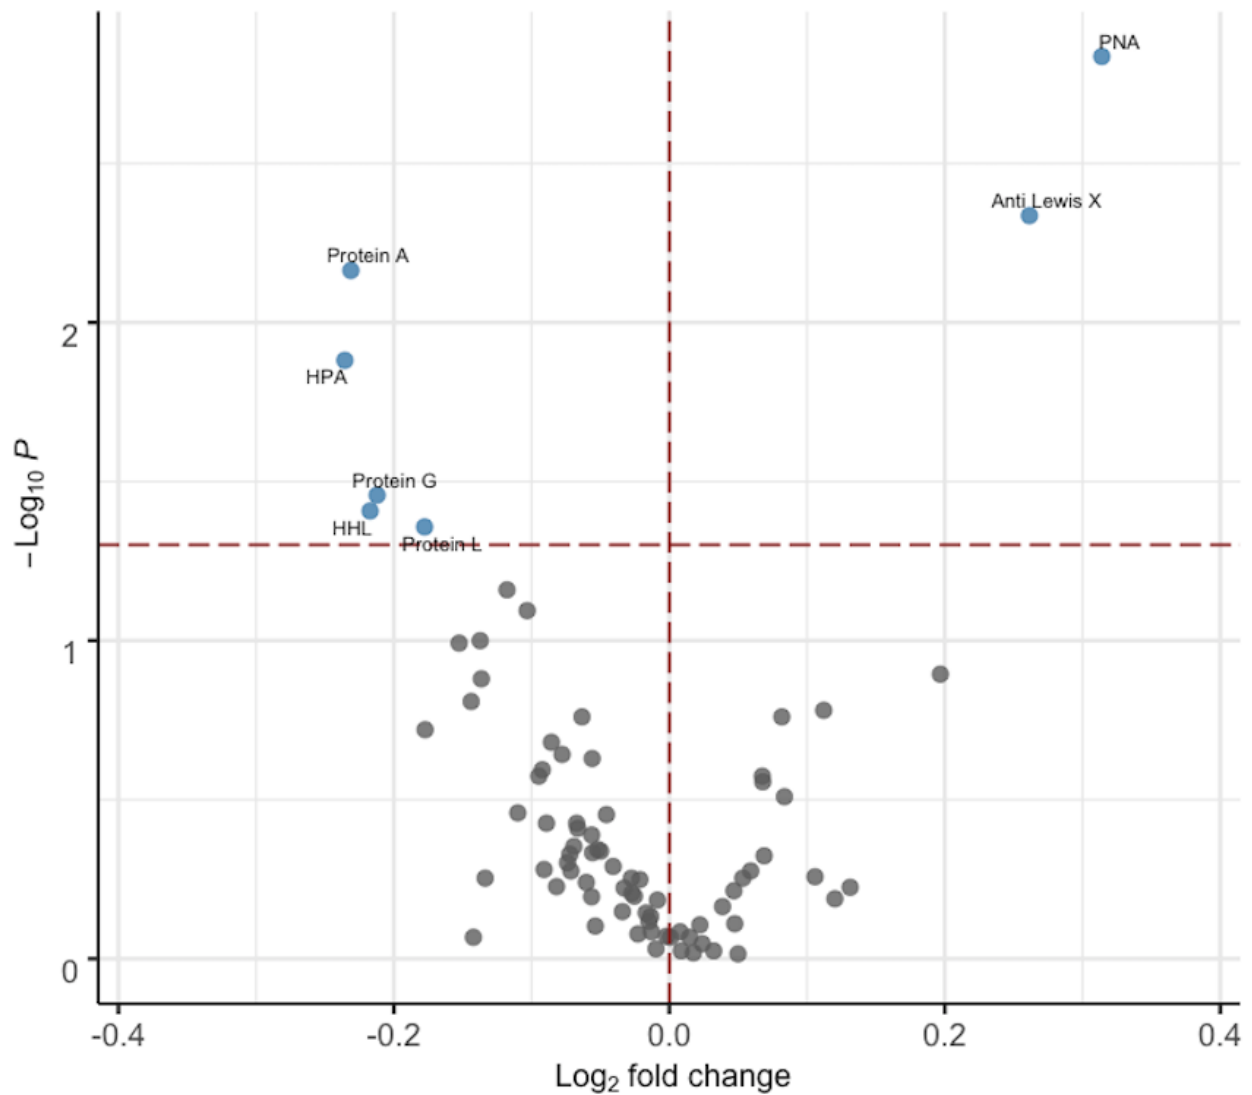

**Figure S12.** Volcano plot comparing the paired pre- and post-vaccination lectin microarray data of non-responders. A positive fold change denotes higher binding of the probe to post-vaccination sera (upregulation). Paired Mann–Whitney U test was used to determine p-values. Probes with  $p < 0.05$  are colored in blue.



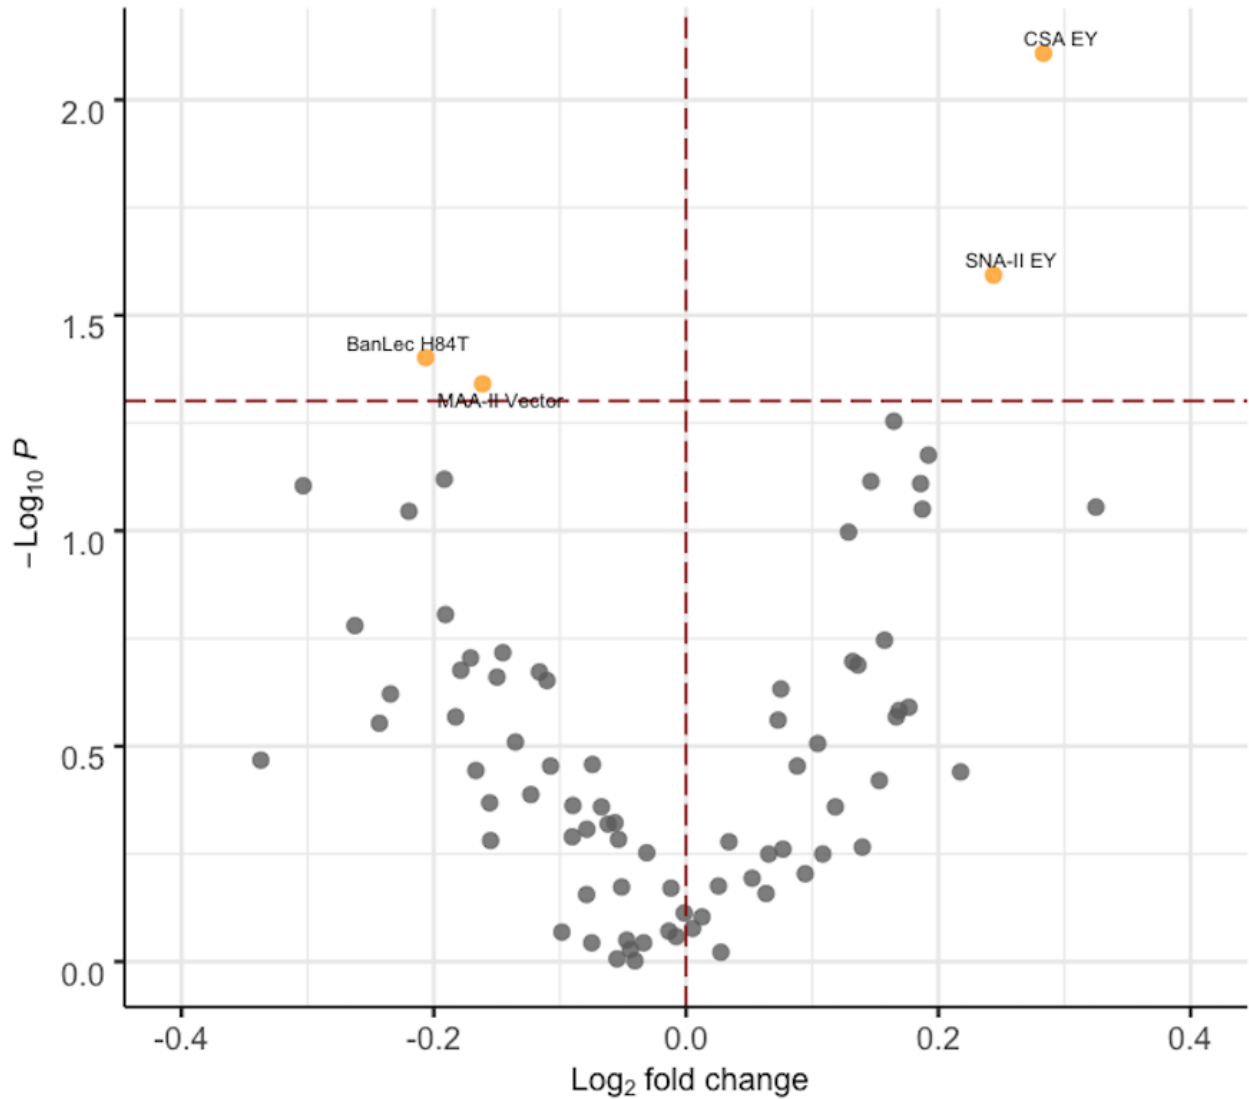

**Figure S13.** Volcano plot comparing lectin microarray data for high responders (N = 66) and low/moderate-responders (N = 39) post-vaccination. A positive fold change denotes higher binding of the probe in high responders. Mann–Whitney U test was used to determine p-values. Probes with  $p < 0.05$  are colored in yellow.

**Table S1.** List of Probes Printed on Lectin Microarrays.

| Probe | Species of origin              | Source                | Printing concentration (mg/ml) | Inhibiting Sugar* |
|-------|--------------------------------|-----------------------|--------------------------------|-------------------|
| ConA  | <i>Concanavalin A</i>          | Millipore Sigma       | 2                              | Man               |
| GNA   | <i>Galanthus nivalis</i>       | Millipore Sigma       | 2                              | Man               |
| AIA   | <i>Artocarpus integrifolia</i> | GlycoMatrix/Bio-world | 2                              | Gal               |
| PHA-E | <i>Phaseolus vulgaris</i>      | Vector Labs           | 2                              | GlcNAc            |
| AIA   | <i>Artocarpus integrifolia</i> | Vector Labs           | 2                              | Gal               |
| LcH   | <i>Lens culinaris</i>          | Vector Labs           | 2                              | Man               |
| SNA   | <i>Sambucus nigra</i>          | Vector Labs           | 2                              | Lac               |
| WGA   | <i>Triticum vulgare</i>        | Vector Labs           | 2                              | GlcNAc            |
| PNA   | <i>Arachis hypogaea</i>        | Vector Labs           | 2                              | Gal               |
| AAL   | <i>Aleuria aurantia</i>        | Vector Labs           | 1.5                            | Fuc               |
| PSA   | <i>Pisum sativum</i>           | Vector Labs           | 2                              | Man               |
| PSA   | <i>Pisum sativum</i>           | GlycoMatrix/Bio-world | 2                              | Man               |
| UEA-I | <i>Ulex europaeus</i>          | Vector Labs           | 2                              | Fuc               |
| LEL   | <i>Lycopersicon esculentum</i> | Vector Labs           | 2                              | GlcNAc            |
| MPL   | <i>Machura pomifera</i>        | Vector Labs           | 2                              | Gal               |
| BPL   | <i>Bauhinia purpurea</i>       | Vector Labs           | 2                              | Gal               |
| MAA-I | <i>Maachia amurensis</i>       | Vector Labs           | 2                              | Lac               |
| STL   | <i>Solanum tuberosum</i>       | Vector Labs           | 2                              | GlcNAc            |
| WFA   | <i>Wisteria floribunda</i>     | Vector Labs           | 2                              | Gal               |
| DBA   | <i>Dolichos Biflorus</i>       | Vector Labs           | 2                              | Gal               |
| SBA   | <i>Glycine max</i>             | Vector Labs           | 2                              | Gal               |
| HHL   | <i>Hippeastrum hybrid</i>      | Vector Labs           | 2                              | Man               |
| DSA   | <i>Datura stramonium</i>       | Vector Labs           | 2                              | Lac               |

|           |                                  |                 |   |        |
|-----------|----------------------------------|-----------------|---|--------|
| ECA       | <i>Erythrina cristagalli</i>     | Vector Labs     | 2 | GlcNAc |
| GSL-II    | <i>Griffonia simplicifolia</i>   | Vector Labs     | 2 | GlcNAc |
| LTL       | <i>Lotus tetragonolobus</i>      | Vector Labs     | 2 | Fuc    |
| GNA       | <i>Galanthus nivalis</i>         | Vector Labs     | 2 | Man    |
| NPL       | <i>Narcissus pseudonarcissus</i> | Vector Labs     | 2 | Man    |
| MAA-II    | <i>Maachia amurensis</i>         | Vector Labs     | 1 | Lac    |
| VVA       | <i>Vicia villosa</i>             | Vector Labs     | 2 | Gal    |
| UEA       | <i>Ulex europaeus</i>            | Millipore Sigma | 2 | Fuc    |
| PHA-L     | <i>Phaseolus vulgaris</i>        | Millipore Sigma | 2 | GlcNAc |
| MAA       | <i>Maachia amurensis</i>         | Millipore Sigma | 2 | Lac    |
| SNA       | <i>Sambucus nigra</i>            | Millipore Sigma | 2 | Lac    |
| MNA-M     | <i>Morniga M</i>                 | EY Labs         | 2 | Man    |
| SNA-I     | <i>Sambucus nigra</i>            | EY Labs         | 2 | Lac    |
| SNA-II    | <i>Sambucus nigra</i>            | EY Labs         | 2 | Gal    |
| PHA-E     | <i>Phaseolus vulgaris</i>        | EY Labs         | 2 | GlcNAc |
| CA        | <i>Colchicum autumnale</i>       | EY Labs         | 2 | GlcNAc |
| MNA-G     | <i>Morniga G</i>                 | EY Labs         | 2 | Gal    |
| UEA-II    | <i>Ulex europaeus</i>            | EY Labs         | 2 | GlcNAc |
| CSA       | <i>Pure cytisus</i>              | EY Labs         | 2 | Gal    |
| UDA       | <i>Urtica dioica</i>             | EY Labs         | 2 | GlcNAc |
| LcH       | <i>Lens culinaris</i>            | EY Labs         | 2 | Man    |
| TL        | <i>Tulipa sp.</i>                | EY Labs         | 2 | GlcNAc |
| ACA       | <i>Amaranthus caudatus</i>       | EY Labs         | 2 | GlcNAc |
| Blackbean | <i>Phaseolus vulgaris</i>        | EY Labs         | 2 | Lac    |
| PHA-L     | <i>Phaseolus vulgaris</i>        | EY Labs         | 2 | GlcNAc |
| UEA-I     | <i>Ulex europaeus</i>            | EY Labs         | 2 | Fuc    |
| LTL       | <i>Lotus tetragonolobus</i>      | EY Labs         | 2 | Fuc    |

|                     |                                    |                            |             |     |
|---------------------|------------------------------------|----------------------------|-------------|-----|
| MAA                 | <i>Maachia amurensis</i>           | EY Labs                    | 2           | Lac |
| PTA GalNAc          | <i>Psophocarpus tetragonolobus</i> | EY Labs                    | 2           | Gal |
| AMA                 | <i>Arum maculatum</i>              | EY Labs                    | 2           | Man |
| PTA Gal             | <i>Psophocarpus tetragonolobus</i> | EY Labs                    | 2           | Gal |
| ASA                 | <i>Allium sativum</i>              | EY Labs                    | 2           | Man |
| HPA                 | <i>Helix pomatia</i>               | Millipore Sigma            | 2           | Gal |
| TJA-II              | <i>Trichosanthes japonica</i>      | Aniara                     | 2           | Lac |
| diCBM40             | <i>Clostridium perfringens</i>     | expressed in-house         | 1.5         | Lac |
| AOL                 | <i>Aspergillus oryzae</i>          | TCI America                | 2           | Fuc |
| Griffithsin         | <i>Griffithsia</i>                 | expressed in-house         | 1.7         | Man |
| SLBR-N              | <i>Streptococcus gordonii</i>      | expressed in-house         | 2           | Lac |
| SLBR-H              | <i>Streptococcus gordonii</i>      | expressed in-house         | 2           | Lac |
| SLBR-B              | <i>Streptococcus gordonii</i>      | expressed in-house         | 2.3         | Lac |
| BamBL               | <i>Burkholderia cepacia</i>        | expressed in-house         | 1.5         | Fuc |
| BanLec H84T         | <i>Musa paradisiaca</i>            | expressed in-house         | 1           | Man |
| Protein A           |                                    | Thermo Fisher              | 0.5         | /   |
| Protein G           |                                    | Thermo Fisher              | 1           | /   |
| Protein L           |                                    | Thermo Fisher              | 0.5         | /   |
| Anti Lewis A        |                                    | Abcam                      | as received | /   |
| Anti Lewis X        |                                    | Millipore Sigma            | as received | /   |
| Anti Lewis Y        |                                    | Abcam                      | as received | /   |
| Anti Lewis B        |                                    | Millipore Sigma            | as received | /   |
| Anti Sialyl Lewis X |                                    | GeneTex                    | as received | /   |
| Anti H1             |                                    | Thermo Fisher / Invitrogen | as received | /   |
| Anti H2             |                                    | Santa Cruz Biotechnology   | as received | /   |
| Anti PolySia        |                                    | Absolute Antibody          | as received | /   |

|                 |                         |                            |             |     |
|-----------------|-------------------------|----------------------------|-------------|-----|
| Anti Lewis A    |                         | Thermo Fisher / Invitrogen | as received | /   |
| Anti Lewis B    |                         | Abcam                      | as received | /   |
| Anti B.G.A      |                         | Abcam                      | as received | /   |
| Anti B.G.A      |                         | Thermo Fisher / Invitrogen | as received | /   |
| Anti B.G.B      |                         | Abcam                      | as received | /   |
| Anti B.G.B      |                         | Thermo Fisher / Invitrogen | as received | /   |
| Cholera Toxin B | <i>Vibrio cholerae</i>  | Millipore Sigma            | 1           | Lac |
| RCA120          | <i>Ricinus communis</i> | Vector Labs                | 2           | Gal |
| Ricin B         | <i>Ricinus communis</i> | Vector Labs                | 1           | Lac |

\*Inhibiting sugars: Man, mannose; Gal, galactose; Fuc, fucose; GlcNAc, N-acetylglucosamine; Lac, lactose.

**Table S2.** Excel file of LFQ Data from Pulldowns.

Available as a separate supplementary excel file.

**Table S3.** Serum Glycoproteins Enriched by BamBL.

| Swiss-Prot accession number | Swiss-Prot entry name | Protein name                                 |
|-----------------------------|-----------------------|----------------------------------------------|
| P19823                      | ITIH2_HUMAN           | Inter-alpha-trypsin inhibitor heavy chain H2 |
| P09871                      | C1S_HUMAN             | Complement C1s subcomponent                  |
| P04003                      | C4BPA_HUMAN           | C4b-binding protein alpha chain              |
| P01023                      | A2MG_HUMAN            | Alpha-2-macroglobulin                        |
| O95445                      | APOM_HUMAN            | Apolipoprotein M                             |
| Q06033                      | ITIH3_HUMAN           | Inter-alpha-trypsin inhibitor heavy chain H3 |
| P35542                      | SAA4_HUMAN            | Serum amyloid A-4 protein                    |
| Q96PD5                      | PGLYRP2_HUMAN         | N-acetylmuramoyl-L-alanine amidase           |
| P01876                      | IGHA1_HUMAN           | Immunoglobulin heavy constant alpha 1        |
| P01857                      | IGHG1_HUMAN           | Immunoglobulin heavy constant gamma 1        |
| P23142                      | FBLN1_HUMAN           | Fibulin-1                                    |
| P02765                      | FETUA_HUMAN           | Alpha-2-HS-glycoprotein                      |
| P01859                      | IGHG2_HUMAN           | Immunoglobulin heavy constant gamma 2        |
| P05156                      | CFAI_HUMAN            | Complement factor I                          |
| P10909                      | CLUS_HUMAN            | Clusterin                                    |
| P14151                      | LYAM1_HUMAN           | L-selectin                                   |
| P01024                      | CO3_HUMAN             | Complement C3                                |
| P20742                      | PZP_HUMAN             | Pregnancy zone protein                       |
| P01877                      | IGHA2_HUMAN           | Immunoglobulin heavy constant alpha 2        |
| Q7Z5P9                      | MUC19_HUMAN           | Mucin-19                                     |
| P08603                      | CFAH_HUMAN            | Complement factor H                          |
| P02749                      | APOH_HUMAN            | Beta-2-glycoprotein 1                        |
| P02743                      | SAMP_HUMAN            | Serum amyloid P-component                    |
| P02671                      | FIBA_HUMAN            | Fibrinogen alpha chain                       |
| P13598                      | ICAM2_HUMAN           | Intercellular adhesion molecule 2            |

|        |             |                                                            |
|--------|-------------|------------------------------------------------------------|
| P51884 | LUM_HUMAN   | Lumican                                                    |
| P00747 | PLMN_HUMAN  | Plasminogen                                                |
| P05546 | HEP2_HUMAN  | Heparin cofactor 2                                         |
| Q96IY4 | CBPB2_HUMAN | Carboxypeptidase B2                                        |
| O75882 | ATRN_HUMAN  | Attractin                                                  |
| P08519 | APOA_HUMAN  | Apolipoprotein(a)                                          |
| P05090 | APOD_HUMAN  | Apolipoprotein D                                           |
| P05452 | TETN_HUMAN  | Tetranectin                                                |
| Q6UXB8 | PII6_HUMAN  | Peptidase inhibitor 16                                     |
| Q9UK55 | ZPI_HUMAN   | Protein Z-dependent protease inhibitor                     |
| Q14520 | HABP2_HUMAN | Hyaluronan-binding protein 2                               |
| P43121 | MUC18_HUMAN | Cell surface glycoprotein MUC18                            |
| Q12913 | PTPRJ_HUMAN | Receptor-type tyrosine-protein phosphatase eta             |
| P08637 | FCG3A_HUMAN | Low affinity immunoglobulin gamma Fc region receptor III-A |
| P22105 | TENX_HUMAN  | Tenascin-X                                                 |
| P33151 | CADH5_HUMAN | Cadherin-5                                                 |
| P07333 | CSF1R_HUMAN | Macrophage colony-stimulating factor 1 receptor            |
| P26927 | HGFL_HUMAN  | Hepatocyte growth factor-like protein                      |
| P15151 | PVR_HUMAN   | Poliovirus receptor                                        |
| P13473 | LAMP2_HUMAN | Lysosome-associated membrane glycoprotein 2                |
| P15814 | IGLL1_HUMAN | Immunoglobulin lambda-like polypeptide 1                   |
| P01833 | PIGR_HUMAN  | Polymeric immunoglobulin receptor                          |
| Q9HDC9 | APMAP_HUMAN | Adipocyte plasma membrane-associated protein               |
| P55290 | CAD13_HUMAN | Cadherin-13                                                |
| P01033 | TIMP1_HUMAN | Metalloproteinase inhibitor 1                              |
| P48740 | MASP1_HUMAN | Mannan-binding lectin serine protease 1                    |
| Q6YHK3 | CD109_HUMAN | CD109 antigen                                              |
| P41222 | PTGDS_HUMAN | Prostaglandin-H2 D-isomerase                               |



|        |              |                                                             |
|--------|--------------|-------------------------------------------------------------|
| Q9UNN8 | EPCR_HUMAN   | Endothelial protein C receptor                              |
| O00533 | NCHL1_HUMAN  | Neural cell adhesion molecule L1-like protein               |
| P12821 | ACE_HUMAN    | Angiotensin-converting enzyme                               |
| P10153 | RNAS2_HUMAN  | Non-secretory ribonuclease                                  |
| P13591 | NCAM1_HUMAN  | Neural cell adhesion molecule 1                             |
| P35916 | VGFR3_HUMAN  | Vascular endothelial growth factor receptor 3               |
| O00187 | MASP2_HUMAN  | Mannan-binding lectin serine protease 2                     |
| P12830 | CDH1_HUMAN   | Cadherin-1                                                  |
| P10721 | KIT_HUMAN    | Mast/stem cell growth factor receptor Kit                   |
| P62937 | PPIA_HUMAN   | Peptidyl-prolyl cis-trans isomerase A                       |
| P16070 | CD44_HUMAN   | CD44 antigen                                                |
| P16109 | LYAM3_HUMAN  | P-selectin                                                  |
| P12259 | FAS_HUMAN    | Coagulation factor V                                        |
| P05164 | PERM_HUMAN   | Myeloperoxidase                                             |
| P17813 | EGLN_HUMAN   | Endoglin                                                    |
| Q6UX71 | PLXDC2_HUMAN | Plexin domain-containing protein 2                          |
| P05154 | IPSP_HUMAN   | Plasma serine protease inhibitor                            |
| P02786 | TFR1_HUMAN   | Transferrin receptor protein 1                              |
| P07359 | GP1BA_HUMAN  | Platelet glycoprotein Ib alpha chain                        |
| Q15762 | CD226_HUMAN  | CD226 antigen                                               |
| Q9BY67 | CADM1_HUMAN  | Cell adhesion molecule 1                                    |
| Q8N6C8 | LILRA3_HUMAN | Leukocyte immunoglobulin-like receptor subfamily A member 3 |
| P02675 | FIBB_HUMAN   | Fibrinogen beta chain                                       |
| Q15166 | PON3_HUMAN   | Serum paraoxonase/lactonase 3                               |
| P17936 | IBP3_HUMAN   | Insulin-like growth factor-binding protein 3                |
| Q8NBP7 | PCSK9_HUMAN  | Proprotein convertase subtilisin/kexin type 9               |

**Table S4.** Serum Glycoproteins Enriched by Anti-Le<sup>a</sup>

| Swiss-Prot accession number | Swiss-Prot entry name | Protein name                                 |
|-----------------------------|-----------------------|----------------------------------------------|
| P08697                      | A2AP_HUMAN            | Alpha-2-antiplasmin                          |
| P10586                      | PTPRF_HUMAN           | Receptor-type tyrosine-protein phosphatase F |
| Q99784                      | NOE1_HUMAN            | Noelin                                       |
| P51884                      | LUM_HUMAN             | Lumican                                      |
| P08519                      | APOA_HUMAN            | Apolipoprotein(a)                            |
| P19823                      | ITIH2_HUMAN           | Inter-alpha-trypsin inhibitor heavy chain H2 |
| P40197                      | GPV_HUMAN             | Platelet glycoprotein V                      |
| Q92820                      | GGH_HUMAN             | Gamma-glutamyl hydrolase                     |
| P02774                      | VTDB_HUMAN            | Vitamin D-binding protein                    |
| P02751                      | FINC_HUMAN            | Fibronectin                                  |
| Q15485                      | FCN2_HUMAN            | Ficolin-2                                    |
| P12259                      | FA5_HUMAN             | Coagulation factor V                         |
| Q02413                      | DSG1_HUMAN            | Desmoglein-1                                 |
| P07858                      | CATB_HUMAN            | Cathepsin B                                  |
| P35222                      | CTNB1_HUMAN           | Catenin beta-1                               |
| Q9NQ79                      | CRAC1_HUMAN           | Cartilage acidic protein 1                   |
| P10909                      | CLUS_HUMAN            | Clusterin                                    |
| P00751                      | CFAB_HUMAN            | Complement factor B                          |
| P11597                      | CETP_HUMAN            | Cholesteryl ester transfer protein           |
| P02748                      | CO9_HUMAN             | Complement component C9                      |
| P07357                      | CO8A_HUMAN            | Complement component C8 alpha chain          |
| P04003                      | C4BPA_HUMAN           | C4b-binding protein alpha chain              |
| Q9NZP8                      | C1RL_HUMAN            | Complement C1r subcomponent-like protein     |
| P06276                      | CHLE_HUMAN            | Cholinesterase                               |

|        |             |                                   |
|--------|-------------|-----------------------------------|
| O95445 | APOM_HUMAN  | Apolipoprotein M                  |
| P02749 | APOH_HUMAN  | Beta-2-glycoprotein 1             |
| P02656 | APOC3_HUMAN | Apolipoprotein C-III              |
| P02765 | FETUA_HUMAN | Alpha-2-HS-glycoprotein           |
| P43652 | AFAM_HUMAN  | Afamin                            |
| P0DP01 | HV108_HUMAN | Immunoglobulin heavy variable 1-8 |

**Table S5.** Characteristics of Study Participants Grouped by Strain-specific Response**Subtable 1: Strain: Influenza A/H1N1 (A/Brisbane/02/2018)**

|                              | High responders<br>(n = 69) | Low responders<br>(n = 25) | Non responders<br>(n = 66) |
|------------------------------|-----------------------------|----------------------------|----------------------------|
| Male/Female                  | 26/43                       | 10/15                      | 25/41                      |
| Median Age in Years (IQR)    | 51.0 (36.0-64.0)            | 49.0 (28.5-66.0)           | 56.0 (40.0-68.0)           |
| Median Body-Mass Index (IQR) | 28.8 (25.3-32.8)            | 27.3 (23.1-36.0)           | 28.6 (24.4-32.6)           |

**Subtable 2: Strain: Influenza A/H3N2 (A/Kansas/14/2017)**

|                              | High responders<br>(n = 86) | Low responders<br>(n = 9) | Non responders<br>(n = 65) |
|------------------------------|-----------------------------|---------------------------|----------------------------|
| Male/Female                  | 27/59                       | 5/4                       | 29/36                      |
| Median Age in Years (IQR)    | 47.0 (30.5-65.0)            | 44.0 (35.0-55.5)          | 56.5 (44-69.5)             |
| Median Body-Mass Index (IQR) | 29.1 (25.3-33.4)            | 24.4 (23.1-33.9)          | 28.0 (25.4-31.5)           |

**Subtable 3: Strain: Influenza B/Yamagata (B/Phuket/3073/2013)**

|                              | High responders<br>(n = 66) | Low responders<br>(n = 28) | Non responders<br>(n = 66) |
|------------------------------|-----------------------------|----------------------------|----------------------------|
| Male/Female                  | 21/45                       | 12/16                      | 28/38                      |
| Median Age in Years (IQR)    | 47.5 (31.0-58.0)            | 43.0 (28.5-62.5)           | 62 (44.8-70.0)             |
| Median Body-Mass Index (IQR) | 28.1 (25.3-32.7)            | 28.1 (24.2-33.7)           | 29.0 (25.3-32.8)           |

**Subtable 4: Strain: Influenza B/Victoria (B/Colorado/6/2017-like)**

|                              | High responders<br>(n = 68) | Low responders<br>(n = 21) | Non responders<br>(n = 71) |
|------------------------------|-----------------------------|----------------------------|----------------------------|
| Male/Female                  | 23/45                       | 11/10                      | 27/44                      |
| Median Age in Years (IQR)    | 51.0 (34.0-64.0)            | 49.0 (32.5-67.0)           | 54.5 (41.8-68.3)           |
| Median Body-Mass Index (IQR) | 28.6 (25.2-32.8)            | 29.4 (24.8-34.9)           | 27.9 (25.2-31.7)           |
